# Supplementary material for: Tailoring the luminescence of atomic clusters via ligand exchange reaction mediated post synthetic modification
Source: Royal Society of Chemistry journal article supplement (doi:10.1039/c9cp06063d), 2020-01-01
Supplement: c9cp06063d1.pdf [file c9cp06063d1.pdf]

# **Tailoring the luminescence of atomic clusters via Ligand Exchange Reaction Mediated post synthetic modification**

*Srestha Basu,<sup>a\$</sup> Chirantan Gayen <sup>a\$</sup> Santanu Dolai<sup>a</sup> and Anumita Paul<sup>a\*</sup>*

<sup>a</sup>Department of Chemistry, Indian Institute of Technology Guwahati, Guwahati 781039, India

E-mail: [anumita@iitg.ac.in](mailto:anumita@iitg.ac.in)

## **Electronic Supplementary Information**

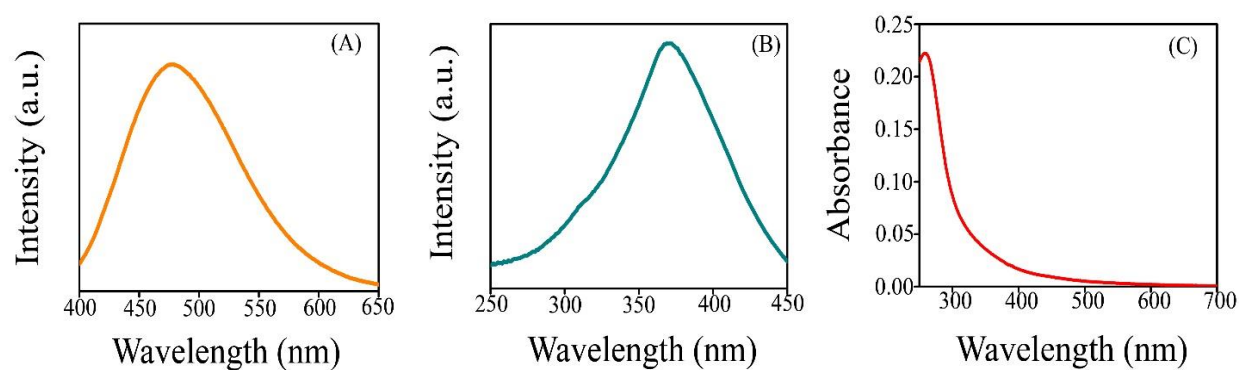

**Fig. S1** (A) Emission spectrum of His Au NCs. Excitation wavelength was set at 370 nm (B) Excitation spectrum of His Au NCs. Emission wavelength was set at 475 nm (C) UV-visible absorbance spectrum of His Au NCs.

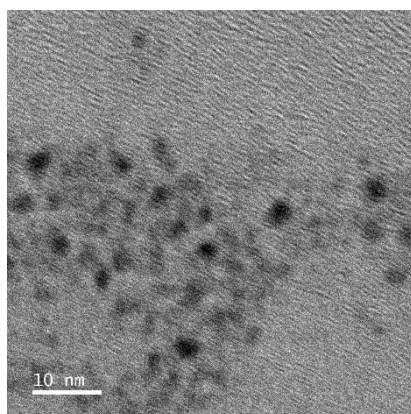

**Fig. S2** TEM image of His Au NCs.

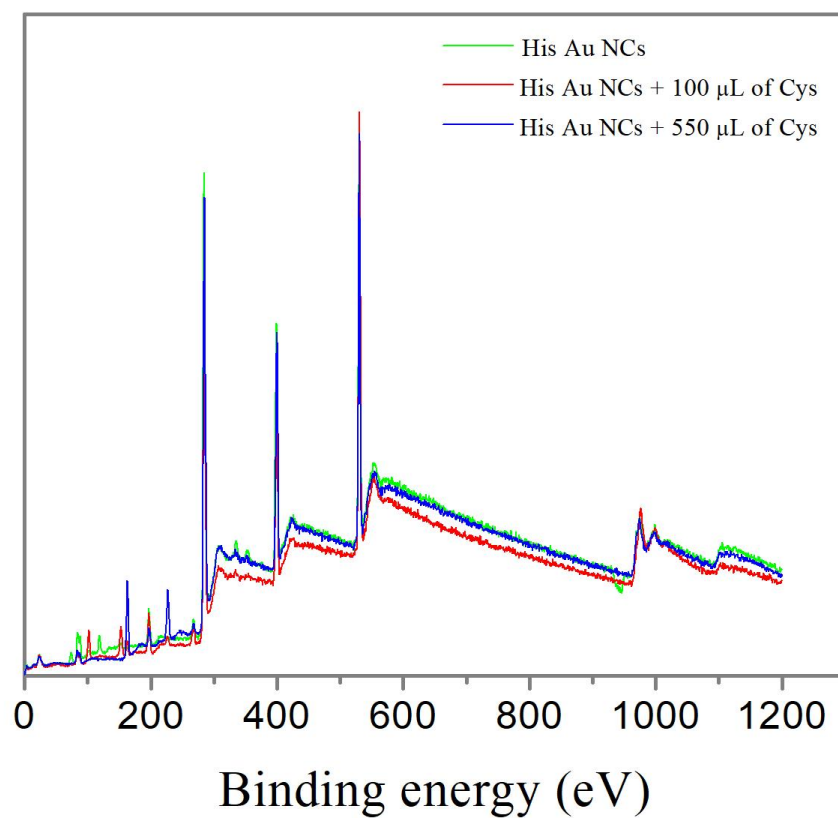

**Fig. S3** Survey spectra of His Au NCs, His Au NCs + 100  $\mu\text{L}$  cysteine and His Au NCs + 550  $\mu\text{L}$  cysteine

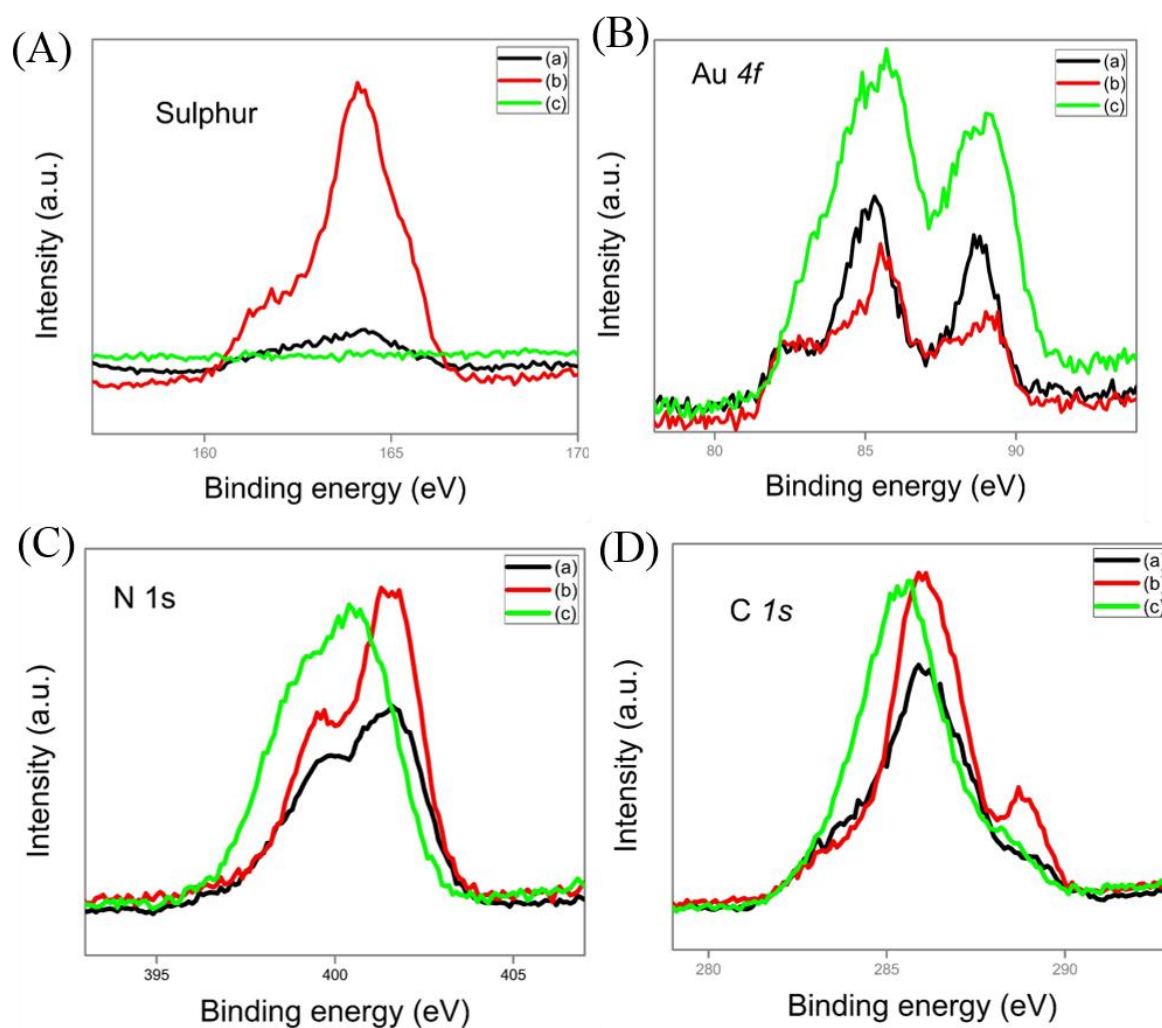

**Fig. S4** XPS spectrum of (A) sulphur 2p, (B) Au 4f, (C) N 1s and (D) C 1s. (a) Black lines denote His Au NCs following addition of 100  $\mu\text{L}$  cysteine, green lines denote only His Au NCs and red lines denote His Au NCs following addition of 500  $\mu\text{L}$  cysteine.

**Table S1:** pH variation of dispersions of His Au NCs upon addition of varying amounts of cysteine.

| Solution                                   | pH of the solution |
|--------------------------------------------|--------------------|
| His Au NCs                                 | 6.85               |
| His Au NCs +10 $\mu$ L of 100 mM cysteine  | 6.86               |
| His Au NCs +20 $\mu$ L of 100 mM cysteine  | 6.85               |
| His Au NCs +30 $\mu$ L of 100 mM cysteine  | 6.80               |
| His Au NCs +40 $\mu$ L of 100 mM cysteine  | 6.78               |
| His Au NCs +50 $\mu$ L of 100 mM cysteine  | 6.76               |
| His Au NCs +60 $\mu$ L of 100 mM cysteine  | 6.80               |
| His Au NCs +70 $\mu$ L of 100 mM cysteine  | 6.79               |
| His Au NCs +80 $\mu$ L of 100 mM cysteine  | 6.79               |
| His Au NCs +90 $\mu$ L of 100 mM cysteine  | 6.78               |
| His Au NCs +100 $\mu$ L of 100 mM cysteine | 6.82               |
| His Au NCs +110 $\mu$ L of 100 mM cysteine | 6.75               |
| His Au NCs +120 $\mu$ L of 100 mM cysteine | 6.76               |
| His Au NCs +130 $\mu$ L of 100 mM cysteine | 6.76               |
| His Au NCs +140 $\mu$ L of 100 mM cysteine | 6.76               |
| His Au NCs +150 $\mu$ L of 100 mM cysteine | 6.77               |
| His Au NCs +200 $\mu$ L of 100 mM cysteine | 6.8                |
| His Au NCs +400 $\mu$ L of 100 mM cysteine | 6.79               |

**Table S2:** Variation in luminescence lifetime of His Au NCs upon addition of cysteine

| Sample                                     | T <sub>1</sub> |                  | T <sub>2</sub> |                  | T <sub>3</sub> |                  | Average lifetime (ns) |
|--------------------------------------------|----------------|------------------|----------------|------------------|----------------|------------------|-----------------------|
|                                            | Lifetime (ns)  | Contribution (%) | Lifetime (ns)  | Contribution (%) | Lifetime (ns)  | Contribution (%) |                       |
| His Au NCs                                 | 1.24           | 37.45            | 5.45           | 53.99            | 0.15           | 8.56             | 4.86                  |
| His Au NCs +40 $\mu$ L of 100 mM cysteine  | 0.97           | 24.65            | 5.37           | 65.81            | 0.04           | 9.55             | 5.08                  |
| His Au NCs +440 $\mu$ L of 100 mM cysteine | 1.48           | 30.64            | 6.54           | 62.71            | 0.07           | 6.65             | 6.03                  |

**Table S3:** Details of XPS analysis of His Au NCs and of that following addition of a cysteine

| Element                                                               | BE@0<br>(width) | %  | BE@100<br>(width) | %  | BE@500<br>(width)      | %  | Peak assignment | Reference & notes                                                                                                                                                                                                                                                                                                                                                                                                                                                                          |
|-----------------------------------------------------------------------|-----------------|----|-------------------|----|------------------------|----|-----------------|--------------------------------------------------------------------------------------------------------------------------------------------------------------------------------------------------------------------------------------------------------------------------------------------------------------------------------------------------------------------------------------------------------------------------------------------------------------------------------------------|
| Au<br>4f <sub>5/2</sub>                                               | 88<br>(0.9)     | 6  | 87.4<br>(0.9)     | 4  | 88<br>(1.9)            | 23 | Au(0)           | <b>Nanoscale</b> , 2015,7, 16372-16380<br><br><b>Nanoscale</b> , 2017,9, 15033-15043                                                                                                                                                                                                                                                                                                                                                                                                       |
|                                                                       | 89.2<br>(1.6)   | 29 | 88.8<br>(1.1)     | 31 | 89.3<br>(1)            | 11 | Au(δ+)          |                                                                                                                                                                                                                                                                                                                                                                                                                                                                                            |
| Au<br>4f <sub>7/2</sub>                                               | 83.2<br>(1.5)   | 8  | 82.6<br>(1.4)     | 12 | 82.4<br>(1.0)          | 11 | Au(0)           | <b>Nanoscale</b> , 2018,10, 3792-3798<br><br><b>J. Am. Chem. Soc.</b> , 2005, 127, 5261–5270<br><br><b>Nanoscale</b> , 2012, 4, 7727–7734<br><br><br>Peak sharpens: Au-S bond formation<br><br>δ+ assignment means oxidation state close to +1                                                                                                                                                                                                                                             |
|                                                                       |                 |    |                   |    | 84.6                   | 38 | Au(δ+)          |                                                                                                                                                                                                                                                                                                                                                                                                                                                                                            |
|                                                                       | 85.5<br>(2.5)   | 57 | 85.1<br>(1.6)     | 53 | (2.5)<br>85.6<br>(1.8) | 17 |                 |                                                                                                                                                                                                                                                                                                                                                                                                                                                                                            |
|                                                                       |                 |    |                   |    |                        |    |                 |                                                                                                                                                                                                                                                                                                                                                                                                                                                                                            |
| Sulphur<br>2p <sub>3/2</sub> -<br>2p <sub>1/2</sub> =1.18eV,<br>(2:1) | -               | -  | 161.9<br>(1.8)    | 27 | 161.5<br>(1.2)         | 12 | Au-SR           | <b>Journal of Nanobiotechnology</b> volume 9, article number: 26 (2011)<br><br><b>Nanoscale</b> , 2014, 6, 8091-8099<br><br><b>Langmuir</b> 2004, 20, 10223-10230<br><br><b>Nanoscale</b> , 2012, 4, 7727–7734<br><br><b>Colloids and Surfaces A: Physicochem. Eng. Aspects</b> 2000, 175, 121 – 128<br><br><br>S <sub>3/2</sub> and S <sub>5/2</sub> peaks: unresolved in fig3 due to poor signal to noise ratio. Incomplete resolution in fig 3F due to close overlapping shoulder peaks |
|                                                                       |                 |    |                   |    | 162.8<br>(1.2)         | 14 | Au-SR           |                                                                                                                                                                                                                                                                                                                                                                                                                                                                                            |
|                                                                       |                 |    | 164.3<br>(2.1)    | 73 | 164.2<br>(1.3)         | 58 | RS-H            |                                                                                                                                                                                                                                                                                                                                                                                                                                                                                            |
|                                                                       |                 |    |                   |    | 165.5<br>(1)           | 16 |                 |                                                                                                                                                                                                                                                                                                                                                                                                                                                                                            |
|                                                                       |                 |    |                   |    |                        |    |                 |                                                                                                                                                                                                                                                                                                                                                                                                                                                                                            |

|                |                |    |                |    |                |    |                                                                                          |                                                                                                                                    |
|----------------|----------------|----|----------------|----|----------------|----|------------------------------------------------------------------------------------------|------------------------------------------------------------------------------------------------------------------------------------|
| Nitrogen<br>1s |                |    | 396.7<br>(1.3) | 3  |                |    |                                                                                          | <b>J. Phys. Chem. B</b> , 2005, 109, 884-891                                                                                       |
|                | 398.9<br>(2.1) | 45 | 398.1<br>(1.1) | 7  |                |    | imine ( $-\underline{\text{N}}=\text{C}-\text{NH}$ )                                     | <b>J. Phys. Chem. B</b> 2008, 112, 13655–13660<br><b>Langmuir</b> 2010, 26(11), 8606–8613<br><b>Nanoscale</b> , 2012, 4, 7727–7734 |
|                |                |    | 399.5<br>(1.6) | 32 | 399.5<br>(1.6) | 33 | -NH <sub>2</sub> (cys)                                                                   | <b>Langmuir</b> 2004, 20, 10223-10230                                                                                              |
|                | 400.9<br>(1.9) | 55 |                |    |                |    | amine( $\text{N}=\text{C}-\underline{\text{N}}\text{H}-$ )<br>-NH <sub>2</sub> (his)     | <b>J. Phys. Chem. C</b> 2014, 118, 10481–10487                                                                                     |
|                |                |    | 401.6<br>(1.8) | 58 | 401.6<br>(1.6) | 67 | -NH <sub>3</sub> <sup>+</sup>                                                            | Deconvolution and assignment is complicated by zwitterionic and protonated forms of histidine & cysteine                           |
| Carbon<br>1s   |                |    | 283.1<br>(1.5) | 8  |                |    | $\underline{\text{C}}-\text{SAu}$ (cys)                                                  | <b>J. Phys. Chem. B</b> , 2005, 109, 884-891                                                                                       |
|                | 285.5<br>(2.5) | 92 | 285.5<br>(2.4) | 52 | 284.2<br>(2.4) | 17 | imidazole C,<br>-CH <sub>2</sub> -<br>- $\underline{\text{C}}(\text{NH}_2)\text{HCOO}^-$ | <b>J. Phys. Chem. B</b> 2008, 112, 13655–13660<br><b>Langmuir</b> 2004, 20, 10223-10230                                            |
|                |                |    | 286<br>(1)     | 13 | 285.8<br>(1.2) | 38 | C-SH (cys)                                                                               | <b>Applied Surface Science</b> 2018, 435, 870–879                                                                                  |
|                | 288<br>(1.4)   | 8  | 287.2<br>(1.3) | 17 | 286.9<br>(1.3) | 30 | - $\underline{\text{C}}-\text{NH}_2$ (cys)<br><br>$\underline{\text{C}}\text{OO}^-$      |                                                                                                                                    |
|                |                |    | 288.9<br>(1.4) | 10 | 288.8<br>(1.2) | 15 | $\underline{\text{C}}\text{OOH}$                                                         |                                                                                                                                    |



**Additional figures:**

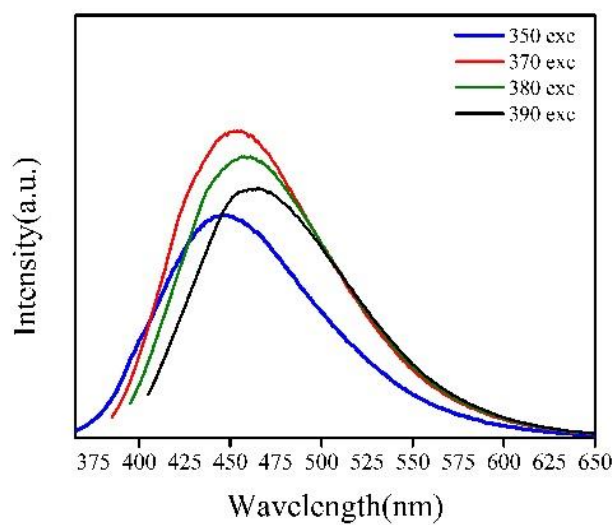

**Fig. S5** Excitation dependent (as mentioned in figure legends) emission spectra of His Au NCs

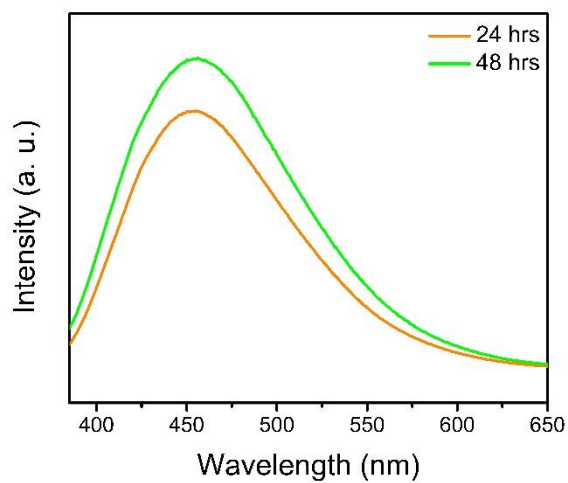

**Fig. S6** Emission spectra of His Au NCs recorded after 24 h and 48 h of preparation.
